# Supplementary material for: Drug Export Pathway of Multidrug Exporter AcrB Revealed by DARPin Inhibitors
Source: PLOS journal article supplement (doi:10.1371/journal.pbio.0050007), 2006-12-21
Supplement: S1 (10.1371/journal.pbio.0050007.s001) [file journal.pbio.0050007.s001]

**Figure S1.** Surface Plasmon Resonance Analysis of the AcrB-DARPin complexes

SPR analysis of 1108_19

| **Clone** | **kon [M-1s-1]** | **koff [s-1]** | **KD [M]** | **R6G sensitivity**  **[g/ml R6G]** |
| --- | --- | --- | --- | --- |
|  |  |  |  |  |
| 1108_19 | 8.7·105 | 2.4·10-2 | 28.0·10-9 | 32 |
| 1108_05 | 1.2·106 | 6.5·10-2 | 52.3·10-9 | 8 |
| 1108_06 | 3.4·105 | 3.4·10-2 | 98.9·10-9 | 16 |
| 1108_09 | 1.1·106 | 4.1·10-3 | 3.6·10-9 | 4 |
| 2907_05 | 1.8·106 | 4.2·10-2 | 23.4·10-9 | 32 |
|  |  |  |  |  |
