# Supplementary figures and images for: Drug Export Pathway of Multidrug Exporter AcrB Revealed by DARPin Inhibitors
Source: PLOS journal article supplement (doi:10.1371/journal.pbio.0050007), 2006-12-21

**Figure S4.** Detergent Molecules in the Structure


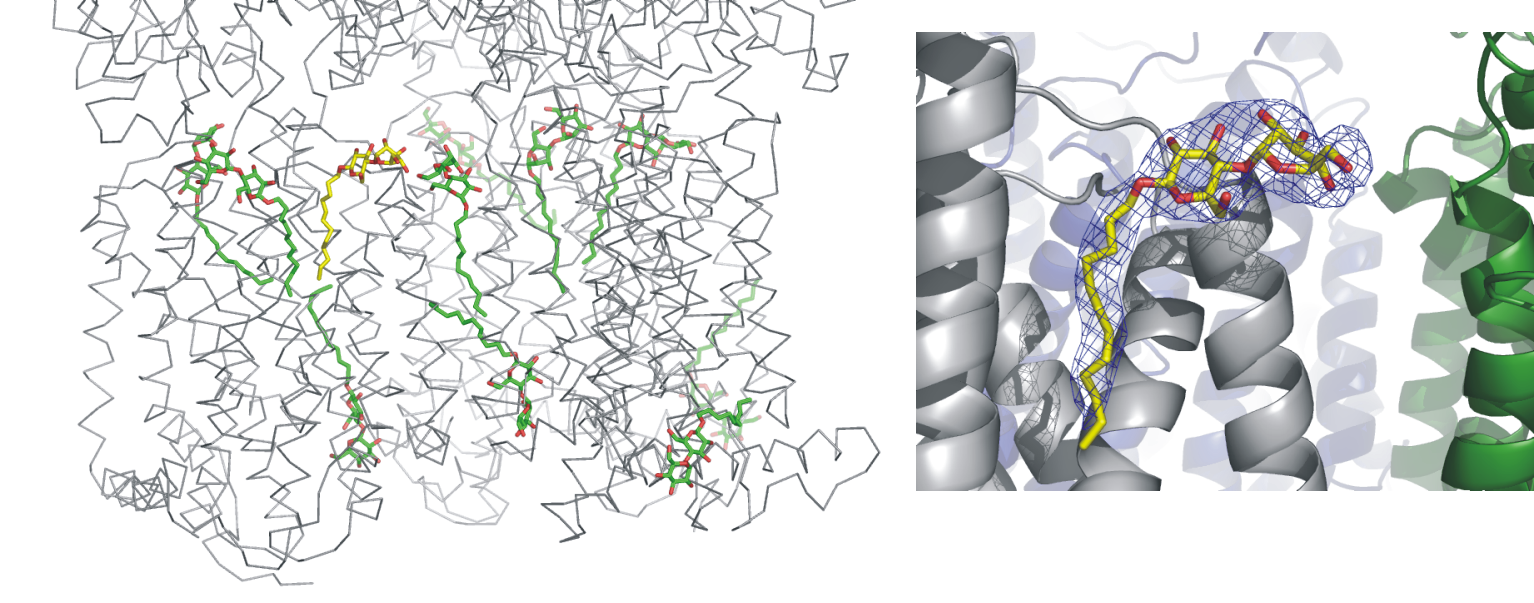

Supplement: S4 (10.1371/journal.pbio.0050007.s004) [file journal.pbio.0050007.s004]
